# Supplementary material
Source: MDPI journal article supplement (https://www.mdpi.com/2073-445X/10/8/860)
Supplement: s1 [file s1]

## Supplemental files

**Table S1.** Survey questionnaire

Wetlands are a very valuable natural resource. Ghara Gheshlagh wetland is no exception to this rule. In addition, farmers' participation in the management and conservation of the wetlands is one of the most important pillars of any sustainable management program in the field of wetlands. Present research project aims at analyzing the determinants of farmers' intentions towards participation in management and conservation of Ghara Gheshlagh Wetland. Your cooperation in completing this questionnaire can be a great help in collecting valid data and taking the right measures in the field of wetland management and protection. It should be noted that the information provided by you will be completely confidential.

Thank you so much for your time and cooperation in advance.

**Please rate your agreement with each of the following items from 0 (strongly disagree) to 4 (strongly agree).**

| Variable                                                                  | Item                                                                                                                                | Strongly disagree | Disagree | Neither disagree nor agree | Agree | Strongly agree |
|---------------------------------------------------------------------------|-------------------------------------------------------------------------------------------------------------------------------------|-------------------|----------|----------------------------|-------|----------------|
|                                                                           |                                                                                                                                     | 0                 | 1        | 2                          | 3     | 4              |
| Intention towards participation in management and conservation (IPMC)     | I want to pay for the rehabilitation and conservation of Ghara Gheshlagh wetland.                                                   |                   |          |                            |       |                |
|                                                                           | I want to learn the necessary skills for the conservation and management of Ghara Gheshlagh wetland.                                |                   |          |                            |       |                |
|                                                                           | I would like to participate in the management and conservation of Ghara Gheshlagh wetland.                                          |                   |          |                            |       |                |
|                                                                           | I would like to cooperate with the government, experts, and stakeholders involved in the rehabilitation of Ghara Gheshlagh wetland. |                   |          |                            |       |                |
| Attitude towards participation in management and conservation (APMC)      | Usefulness of participation in wetland conservation and management                                                                  |                   |          |                            |       |                |
|                                                                           | Prioritization of personal interests such as increasing product over wetland conservation and management                            |                   |          |                            |       |                |
|                                                                           | Necessity of wetland conservation and management in water shortage conditions                                                       |                   |          |                            |       |                |
|                                                                           | Necessity of cooperation and participation of all stakeholders in wetland conservation and management                               |                   |          |                            |       |                |
|                                                                           | The desirability of engagement in wetland conservation and management                                                               |                   |          |                            |       |                |
|                                                                           | Considering participation in wetland conservation and management as a wise behavior                                                 |                   |          |                            |       |                |
|                                                                           | Trusting the wetland conservation and management plans                                                                              |                   |          |                            |       |                |
| Perceived behavioral control on participation management and conservation | Having the time and skills needed to participate in wetland management and conservation                                             |                   |          |                            |       |                |
|                                                                           | Having the necessary economic capability to participate in wetland conservation and management activities                           |                   |          |                            |       |                |
|                                                                           | Ease of participation in the wetland conservation and management                                                                    |                   |          |                            |       |                |
|                                                                           | Having the knowledge needed to participate in the wetland conservation and management                                               |                   |          |                            |       |                |
| M o r a l                                                                 | I feel that I am a good person if I help protect and revitalize the wetland.                                                        |                   |          |                            |       |                |

|                                                                               |                                                                                                                                              |  |  |  |  |  |
|-------------------------------------------------------------------------------|----------------------------------------------------------------------------------------------------------------------------------------------|--|--|--|--|--|
|                                                                               | I consider it a moral duty to participate in the better conserving and managing of the wetland.                                              |  |  |  |  |  |
|                                                                               | I feel that I have to do useful work for better conserving and managing of wetland.                                                          |  |  |  |  |  |
|                                                                               | I have a sense of commitment to participate in the wetland conservation and management.                                                      |  |  |  |  |  |
| Subjective norms towards participation in management and conservation (SNPMC) | Commitment to participate in the management and conservation of the wetland will lead to my approval by those around me.                     |  |  |  |  |  |
|                                                                               | I think my acquaintances and friends expect me to be as committed as I can to participate in the management and conservation of the wetland. |  |  |  |  |  |
|                                                                               | My acquaintances and friends think that I should be committed to participating in the management and conservation of the wetland.            |  |  |  |  |  |
| Self-concept about participation in management and conservation (SCPMC)       | I believe that I am a person with environmental concerns in Ghara Gheshlagh wetland.                                                         |  |  |  |  |  |
|                                                                               | My self-image is a person committed to participating in the management and conservation of the wetland.                                      |  |  |  |  |  |
|                                                                               | I think I am a person who participates in the management and conservation of the wetland (water conservationist).                            |  |  |  |  |  |
